# Supplementary material
Source: PubMed Central journal article supplement (PMC6145657)
Supplement: jamaoncol-4-702-s001.pdf [file jamaoncol-4-702-s001.pdf]

## Supplementary Online Content

Slovin S, Clark W, Carles J, et al. Seizure rates in enzalutamide-treated men with metastatic castration-resistant prostate cancer and risk of seizure: the UPWARD study. *JAMA Oncol*. Published online December 7, 2017. doi:10.1001/jamaoncol.2017.3361

**eMethods.** Additional Methods Descriptions

**eAppendix.** Institutional Review Boards That Approved the Study

**eTable 1.** List of Medications That May Lower Seizure Threshold

**eTable 2.** Demographic and Baseline Characteristics

**eTable 3.** Seizure Risk Categories

**eTable 4.** Patients Experiencing a Seizure

This supplementary material has been provided by the authors to give readers additional information about their work.

## **eMethods. Additional Methods Descriptions**

### ***Patient Inclusion and Exclusion Criteria***

Patients were eligible if they had histologically confirmed metastatic adenocarcinoma of the prostate, ongoing androgen deprivation therapy with a gonadotropin-releasing hormone analog or prior orchiectomy, and disease progression characterized by  $\geq 1$  of the following: prostate-specific antigen progression (defined by a minimum of two rising prostate-specific antigen levels with an interval of  $\geq 1$  week apart; Prostate Cancer Clinical Trials Working Group 2 guidelines), bone disease progression (defined by Prostate Cancer Clinical Trials Working Group 2 guidelines), soft tissue disease progression (defined by Response Evaluation Criteria In Solid Tumors, version 1.1), and Eastern Cooperative Oncology Group performance status of 0-2. Enrolled patients were required to have  $\geq 1$  potential risk factor for seizure, including: a history of seizure (due to any cause except a single febrile seizure in childhood); transient ischemic attack, traumatic brain injury, or head injury with loss of consciousness; cerebrovascular accident, arteriovenous malformations of the brain, or brain infection; unexplained loss of consciousness within the past 12 months; presence of space-occupying lesion in the brain or primary brain tumor; presence of Alzheimer's disease, meningioma, or leptomeningeal disease from prostate cancer; or current use of medication that may lower the seizure threshold (eTable 1).

Exclusion criteria included: history of exposure to enzalutamide; severe concurrent disease, infection, or comorbidity; current treatment with anti-seizure medication; history of seizure in the 12 months prior to screening; rapidly progressive visceral disease; clinical signs suggestive of high or imminent risks for pathologic fracture, spinal cord compression, and/or cauda equina syndrome; absolute neutrophil count  $< 1500/\mu\text{L}$ ; platelet count  $< 100000/\mu\text{L}$  or hemoglobin  $< 5.6 \text{ mmol/L}$  (9 g/dL); total bilirubin levels  $\geq 1.5 \times$  upper limit of normal or alanine aminotransferase/aspartate aminotransferase levels  $\geq 2.5 \times$  upper limit of normal; estimated creatinine clearance of  $< 30 \text{ mL/min}$ ; resting systolic blood pressure  $> 160 \text{ mmHg}$  or diastolic blood pressure  $> 100 \text{ mmHg}$  at screening; received an investigational agent within 4 weeks or five half-lives, whichever was longer, prior to day 1; and any condition that, in the investigator's opinion, made the patient unsuitable for study participation.

### ***Evaluation of Suspected Seizures***

The study site interviewed the patient and any witnesses, if possible, regarding the event and completed a Suspected Seizure Event Questionnaire. Suspected seizures were evaluated by a local neurologist using electroencephalograms and magnetic resonance imaging of the brain as soon as possible after the occurrence of the potential seizure event. An Independent Adjudication Committee, consisting of three neurologists with expertise in epilepsy, was responsible for confirming all potential seizure events. For patients experiencing seizure events, an allowable anti-epileptic could be administered on a maintenance basis and enzalutamide treatment continued at the discretion of the investigator.

## **eAppendix. Institutional Review Boards That Approved the Study**

Weill Cornell Medical College Institutional Review Board, 407 East 61st Street, RR110, New York, New York

Quorum IRB, 1501 Fourth Avenue, Suite 800, Seattle, Washington  
(previously Quorum IRB, 1601 Fifth Avenue, Suite 1000, Seattle, Washington)

Memorial Sloan-Kettering Cancer Center Institutional Review Board, 1275 York Avenue, M302, New York, New York

Duke University Health System Institutional Review Board, Hock Plaza, 2424 Erwin Road, Durham, North Carolina

Western Institutional Review Board (WIRB), 1019 39th Avenue SE, Suite 120, Puyallup, Washington

Biomedical Research Alliance of New York, LLC IRB, 1981 Marcus Avenue, Suite 210, Lake Success, New York

Comite d'ethique de la recherche du CHU de Quebec, CHU de Quebec – Hopital Saint-Francois d'Assise, 10, rue de L'Espinay, local A0-124, Quebec, Quebec

Comité d'Ethique Hôpital Erasme – ULB Cliniques Universitaires de Bruxelles, Route de Lennik nr. 808, Local 3 W 37, Brussels

Comité de Protection des Personnes Sud-Est II, Hôpital Edouard Herriot – Bâtiment 12 – 1er étage, 5 place d'Arsonval, Lyon Cedex

Corporació Sanitària Parc Taulí, Comité Ético de Investigación Clínica, Fundació Parc Taulí, Edificio Santa Fe, ala Izauierda, 2n Planta, Parc Taulí, num. 1, Sabadell, Barcelona

Pohjois-Pohjanmaan sairaanhoitopiirin alueellinen eettinen toimikunta, Kajaanintie 50, Oulu

Egészségügyi Tudományos Tanács Klinikai Farmakológiai Etikai Bizottság, Arany J. u. 6-8, Budapest

Comitato Etico Area Cremona Mantova  
Lodi, Azienda Ospedaliera Istituti Ospitalieri  
di Cremona, Viale Concordia, 1, Cremona,  
Cremona

Comitato Etico Di Area Vasta Sud Est  
(CEAVSE), Sez. Azienda USL 8 di Arezzo,  
Via Curtatone, 54, Arezzo, Arezzo

Comitato Etico Centrale IRCCS Lazio,  
Sezione IFO – Fondazione Bietti, Via Elio  
Chianesi, 53, Roma, Roma

Comitato Etico IRST IRCCS AVR  
(CEIIAV), Via Piero Maroncelli, 40,  
Meldola, Forli-Cesena

Central and Local Ethics Committee: Eticka  
komise pri Institutu klinicke a experimentalni  
mediciny a Thomayerove nemocnici,  
Videnska 800, Praha 4

NRES Committee London – Harrow, Bristol  
Research Ethics Committee Centre, Level 3,  
Block B, Whitefriars, Lewins Mead, Bristol

Regionala Etikprövningsnämnden I  
Göteborg, Guldhedsgatan 5 A, hus 2, plan 4,  
Göteborg

Ethik-Kommission des Landes Berlin,  
Fehrbelliner Platz 1, Berlin

Comité de Ética del Centro de Oncología e  
Investigación Buenos Aires (CECOIBA),  
Street 12 N° 4756, Berazategui, Buenos Aires

Comité Independiente de Ética para Ensayos  
em Farmacología Clínica (FEFYM), Pte. J.E.  
Urriburu N° 774, Floor 1, Ciudad Autónoma  
de Bs As, Buenos Aires

Comité Institucionalde Ética de al  
Investigación en Salud (CIEIS),  
Balcarce 451, Córdoba, Córdoba

Comité Independiente de Ética para Ensayos  
em Farmacología Clínica (FEFYM), Pte. J.E.  
Urriburu N° 774, Floor 1, Ciudad Autónoma  
de Bs As, Buenos Aires

Comité de Ética en Investigación del  
Instituto Médico Especializado Alexander  
Fleming (CEIAF), Av. Cramer 1180, Floor 2,  
Ciudad Autónoma de Bs As, Buenos Aires

Comité de Evaluación Etica Cientifica,  
Servicio de Salud Araucanía Sur, Andres  
Bello 636, Temuco, IX Region

Comité Etico Cientifico Clinica Reñaca,  
Anabaena 336, Jardin del Mar Reñaca, Viña  
del Mar, V Region

Comité de Ética de la Investigación, Servicio  
Salud Metropolitano Norte, San José 1053,  
Independencia, Santiago, Region  
Metropolitana

Southern Adelaide Clinical Human Research  
Ethics Committee, Flinders Medical Centre,  
The Flats G5, Rooms 3 and 4, Flinders Drive,  
Bedford Park, South Australia

Macquarie University Human Research  
Ethics Committee (Medical Sciences),  
Level 3, Research HUB, C5C East,  
Macquarie University, New South Wales

Health and Disability Ethics Committee,  
Ministry of Health, C/-MEDSAFE, Level 6,  
Deloitte House, 10 Brandon Street,  
Wellington, Wellington

Domain Specific Review Board (DSRB), 3  
Fusionopolis Link, 03-08 Nexus@one-north,  
Singapore

Institutional Review Board of Gangnam  
Severance Hospital, 211 Eonju-ro,  
Gangnam-gu, Seoul

Samsung Medical Center Institutional  
Review Board, 81 Irwon-ro, Gangnam-gu,  
Seoul

The Catholic University of Korea, Seoul  
St. Mary's Hospital Institutional Review  
Board, 222 Banpo-daero, Seocho-gu, Seoul

Seoul National University Bundang Hospital  
Institutional Review Board, 82 Gumi-ro,  
173 Beon-gil, Bundang-gu, Seongnam-si,  
Gyeonggi-do

Seoul National University Hospital  
Institutional Review Board, 101 Dachak-ro,  
Jongno-gu, Seoul

Kaohsiung Veterans General Hospital  
Institutional Review Board, No. 386,  
Dazhong 1st Rd., Zuoying Dist. Kaohsiung

National Taiwan University Hospital  
Institutional Review Board, No. 7, Chung  
Shan S. Rd., Zhongzheng Dist., Taipei

Kaohsiung Medical University Chung-Ho  
Memorial Hospital Institutional Review  
Board, No. 100, Tzyou 1st Rd., Kaohsiung

Ethics Committee of Assaf Harofeh Medical  
Center, Zerifin

Ethics Committee of Meir Medical Center,  
59 Tcharnichovsky st., Kfar-Saba

Ethics Committee of Soroka University  
Medical Center, Rager Boulevard, Beer-  
Sheva

Ethics Committee of Hadassah Medical  
Center, Ein Kerem, Jerusalem

Ethics Committee of Rambam Medical  
Center, 8 Ha-Aliya St., Haifa

Ethics Committee of Rabin Medical Center,  
39 Jabotinski St., Petah-Tikva

Ethics Committee of Sheba Medical Center,  
Tel Hashomer, Ramat Gan, Ramat Gan

Ethics Committee of Galilee Medical Center,  
Sderot HaNassi Ben Tsvi, Naharia

Henry Ford Health System, Institutional  
Review Board, 2799 West Grand Boulevard,  
CFP Basement, Room 046, Detroit,  
Michigan

University Health Network Research Ethics  
Board, 700 University Avenue, 10th Floor,  
Suite 1056, Toronto, Ontario

Capital Health Research Ethics Board,  
5790 University Avenue, CCR, Room 118,  
Halifax, Nova Scotia

Health and Disability Ethics Committee,  
Ministry of Health, C/-MEDSAFE, Level 6,  
Deloitte House, 10 Brandon Street,  
Wellington, Wellington

Severance Hospital Institutional Review  
Board, Severance Hospital, Yonsei  
University College of Medicine,  
50 Yonsei-ro, Seodaemun-gu, Seoul

Asan Medical Center Institutional Review Board, 88, Olympic-ro 43-gil, Songpa-gu, Seoul

Joint Chinese University of Hong Kong – New Territories East Cluster Clinical Research Ethics Committee, 8/F, Lui Che Woo Clinical Sciences Building, Prince of Wales Hospital, Shatin

Chung Gung Medical Foundation IRB, No. 199, Tunghwa North Rd, Taipei

China Medical University Hospital Institutional Review Board, No. 2, YuDe Road, Taichung

**eTable 1. List of Medications That May Lower Seizure Threshold**

|                                                                                                                                                       |
|-------------------------------------------------------------------------------------------------------------------------------------------------------|
| <b>Therapeutic subgroup (ATC 2nd level)</b><br>Chemical subgroup (ATC 4th level)                                                                      |
| All other therapeutic products<br>Antidotes                                                                                                           |
| Analgesics<br>Diphenylpropylamine derivatives<br>Natural opium alkaloids<br>Other opioids<br>Phenylpiperidine derivatives                             |
| Anesthetics<br>Opioid anesthetics                                                                                                                     |
| Antibacterials for systemic use<br>Beta-lactam antibacterials, penicillins                                                                            |
| Anti-emetics and anti-nauseants<br>Other antiemetics                                                                                                  |
| Anti-epileptics<br>Benzodiazepine derivatives                                                                                                         |
| Antihistamines for systemic use<br>Aminoalkyl ethers<br>Other antihistamines for systemic use<br>Phenothiazine derivatives<br>Substituted alkylamines |
| Anti-inflammatory and anti-rheumatic products<br>Other anti-inflammatory/anti-rheumatic agents in combination with other drugs                        |
| Anti-pruritics, including antihistamines, anesthetics, etc<br>Antihistamines for topical use                                                          |
| Cardiac therapy<br>Other cardiac stimulants                                                                                                           |
| Diagnostic agents<br>Tests for gastric secretion                                                                                                      |
| Drugs for functional gastrointestinal disorders<br>Belladonna alkaloids, semisynthetic, quaternary ammonium compounds                                 |
| Drugs for obstructive airway diseases<br>Anticholinergics                                                                                             |



|                                                                                                                                                                                                                                                                                                                                                                                                                                                                                                                                                                                                                                                                          |
|--------------------------------------------------------------------------------------------------------------------------------------------------------------------------------------------------------------------------------------------------------------------------------------------------------------------------------------------------------------------------------------------------------------------------------------------------------------------------------------------------------------------------------------------------------------------------------------------------------------------------------------------------------------------------|
| <p>Drugs used in diabetes</p> <ul style="list-style-type: none"> <li>Biguanides</li> <li>Combinations of oral blood glucose-lowering drugs</li> <li>Dipeptidyl peptidase-4 inhibitors</li> <li>Insulins and analogs for inhalation</li> <li>Insulins and analogs for injection, fast-acting</li> <li>Insulins and analogs for injection, intermediate- or long-acting combined with fast-acting</li> <li>Insulins and analogs for injection, intermediate-acting</li> <li>Insulins and analogs for injection, long-acting</li> <li>Other blood glucose-lowering drugs, excluding insulins</li> <li>Sulfonamides, urea derivatives</li> <li>Thiazolidinediones</li> </ul> |
| <p>Nasal preparations</p> <ul style="list-style-type: none"> <li>Anti-allergic agents, excluding corticosteroids</li> <li>Sympathomimetics</li> </ul>                                                                                                                                                                                                                                                                                                                                                                                                                                                                                                                    |
| <p>Ophthalmologicals</p> <ul style="list-style-type: none"> <li>Anticholinergics</li> <li>Other anti-allergics</li> </ul>                                                                                                                                                                                                                                                                                                                                                                                                                                                                                                                                                |
| <p>Psychoanaleptics</p> <ul style="list-style-type: none"> <li>Anticholinesterases</li> <li>Centrally acting sympathomimetics</li> <li>Non-selective monoamine reuptake inhibitors</li> <li>Other antidepressants</li> <li>Selective serotonin reuptake inhibitors</li> <li>Xanthine derivatives</li> </ul>                                                                                                                                                                                                                                                                                                                                                              |
| <p>Psycholeptics</p> <ul style="list-style-type: none"> <li>Benzodiazepine derivatives</li> <li>Butyrophenone derivatives</li> <li>Diazepines, oxazepines, thiazepines, and oxepines</li> <li>Hypnotics and sedatives</li> <li>Other antipsychotics</li> <li>Other hypnotics and sedatives</li> </ul>                                                                                                                                                                                                                                                                                                                                                                    |
| <p>Urologicals</p> <ul style="list-style-type: none"> <li>Drugs for urinary frequency and incontinence</li> <li>Other urologicals</li> </ul>                                                                                                                                                                                                                                                                                                                                                                                                                                                                                                                             |

Abbreviation: ATC, anatomical therapeutic chemical.

**eTable 2. Demographic and Baseline Characteristics**

|                                               | <b>Total (N = 423)<sup>a</sup></b> |
|-----------------------------------------------|------------------------------------|
| Race, <sup>b</sup> n (%)                      |                                    |
| White                                         | 381 (90.1)                         |
| Asian                                         | 25 (5.9)                           |
| Black or African American                     | 9 (2.1)                            |
| Native Hawaiian or other Pacific Islander     | 1 (0.2)                            |
| Other                                         | 4 (0.9)                            |
| No data                                       | 3 (0.7)                            |
| Ethnicity, n (%)                              |                                    |
| Hispanic or Latino                            | 89 (21.0)                          |
| Not Hispanic or Latino                        | 331 (78.3)                         |
| No data                                       | 3 (0.7)                            |
| Age, years                                    |                                    |
| Mean (SD)                                     | 73.2 (8.99)                        |
| Median                                        | 74.0                               |
| Minimum-maximum                               | 48-93                              |
| Age category, n (%)                           |                                    |
| <65 years                                     | 66 (15.6)                          |
| ≥65 years                                     | 357 (84.4)                         |
| ECOG performance status at study entry, n (%) |                                    |
| 0                                             | 188 (44.4)                         |
| 1                                             | 190 (44.9)                         |
| 2                                             | 45 (10.6)                          |
| Prior medication, n (%)                       | 411 (97.2)                         |
| Prior chemotherapy                            | 100 (23.6)                         |

<sup>a</sup>All enrolled patients who took ≥1 dose of study drug and for whom any data was reported after the first dose of study drug (safety analysis set).

<sup>b</sup>Race and/or ethnicity was documented as pre-specified in the protocol, in accordance with country-specific regulations.

Abbreviations: ECOG, Eastern Cooperative Oncology Group; SD, standard deviation.

**eTable 3. Seizure Risk Categories**

| Category, n (%)                                         | SAF (N = 423) <sup>a</sup> |
|---------------------------------------------------------|----------------------------|
| Current medication that may lower seizure threshold     | 242 (57.2)                 |
| History of traumatic brain/head injury with LOC         | 112 (26.5)                 |
| History of CVA or TIA                                   | 94 (22.2)                  |
| Alzheimer's disease, meningioma, leptomeningeal disease | 15 (3.5)                   |
| Unexplained LOC $\leq$ 12 months                        | 14 (3.3)                   |
| Space-occupying brain lesion <sup>b</sup>               | 8 (1.9)                    |
| Past history of seizure <sup>c</sup>                    | 7 (1.7)                    |
| History of brain infection <sup>d</sup>                 | 5 (1.2)                    |
| History of brain arteriovenous malformation             | 3 (0.7)                    |

<sup>a</sup>All enrolled patients who took  $\geq$ 1 dose of study drug and for whom any data were reported after the first dose of study drug (SAF).

<sup>b</sup>Including previously treated brain metastasis or primary CNS tumor.

<sup>c</sup>Due to any cause except a single febrile seizure in childhood.

<sup>d</sup>i.e. abscess, meningitis, or encephalitis.

Patients may fall into multiple categories; therefore, the total percentage is not 100%.

Abbreviations: CNS, central nervous system; CVA, cerebrovascular accident; LOC, loss of consciousness; SAF, safety analysis set; TIA, transient ischemic attack.

**eTable 4. Patients Experiencing a Seizure**

| Patient age, years/ race                   | Last dose day | Relevant medical history                                                             | Seizure risk category                                                                 | Confirmed seizure event day | Seizure event(s) – nature and determined cause                                                                                                                                                                                                                                                                                                                                                                                                                                                                                         |
|--------------------------------------------|---------------|--------------------------------------------------------------------------------------|---------------------------------------------------------------------------------------|-----------------------------|----------------------------------------------------------------------------------------------------------------------------------------------------------------------------------------------------------------------------------------------------------------------------------------------------------------------------------------------------------------------------------------------------------------------------------------------------------------------------------------------------------------------------------------|
| <b>Within the 4-month treatment period</b> |               |                                                                                      |                                                                                       |                             |                                                                                                                                                                                                                                                                                                                                                                                                                                                                                                                                        |
| 60s/White <sup>a</sup>                     | 72            | Use of concomitant medication (fentanyl) and prior stroke                            | Current use of medication that may lower seizure threshold                            | 12<br>72                    | <ul style="list-style-type: none"> <li>Loss of consciousness (syncope) was assessed as not related, as heat stroke provided a more plausible alternative etiology</li> <li>Seizure (tonic clonic): assessed as possibly related to enzalutamide based on temporal association; confounded by concomitant administration of fentanyl and multiple co-morbid conditions</li> </ul>                                                                                                                                                       |
| 70s/NR                                     | 17            | History of seizure                                                                   | Past history of seizure due to any cause except a single febrile seizure in childhood | 17                          | <ul style="list-style-type: none"> <li>Loss of consciousness: assessed as possibly related to enzalutamide in agreement with the investigator, based on the implied temporal relationship. Underlying multiple co-morbidities, including orthostatic hypotension, concomitant medications, and elderly age were considered confounders. Sponsor considered loss of consciousness an event of interest</li> </ul>                                                                                                                       |
| 70s/White                                  | 79            | Use of concomitant medication (not specified) and multiple underlying co-morbidities | History of CVA                                                                        | 62<br>77                    | <ul style="list-style-type: none"> <li>Suspicion of cerebral seizure (convulsion): assessed as not related to enzalutamide with the confounder of cerebral atherosclerosis</li> <li>Seizure II (convulsion): in agreement with investigator, assessed as possibly related to enzalutamide</li> <li>Short seizures: in agreement with investigator, assessed as not related to enzalutamide with the confounder of cerebral atherosclerosis. Short seizures occurred 20 days after permanent discontinuation of enzalutamide</li> </ul> |
| 60s/White <sup>a</sup>                     | 65            | Parenchymal metastases                                                               | Previously treated brain metastasis                                                   | 65                          | <ul style="list-style-type: none"> <li>In agreement with the investigator, the event of seizure (convulsion) was assessed as not related to enzalutamide since the CNS metastasis provided a more plausible explanation</li> </ul>                                                                                                                                                                                                                                                                                                     |

| After the 4-month treatment period |     |                                                                   |                                                                                                                           |                |                                                                                                                                                                                                                                                                                                                                                                                                                                                                                                                                                           |
|------------------------------------|-----|-------------------------------------------------------------------|---------------------------------------------------------------------------------------------------------------------------|----------------|-----------------------------------------------------------------------------------------------------------------------------------------------------------------------------------------------------------------------------------------------------------------------------------------------------------------------------------------------------------------------------------------------------------------------------------------------------------------------------------------------------------------------------------------------------------|
| 70s/White                          | 147 |                                                                   | History of head injury with loss of consciousness<br>Presence of Alzheimer's disease                                      | 147            | <ul style="list-style-type: none"> <li>Seizure: in agreement with the investigator, determined to be possibly related to enzalutamide</li> </ul>                                                                                                                                                                                                                                                                                                                                                                                                          |
| 80s/Asian                          | 128 |                                                                   | History of traumatic brain injury                                                                                         | 128            | <ul style="list-style-type: none"> <li>Seizure: in agreement with the investigator, assessed as possibly related to enzalutamide, subdural hematoma being a strong confounder. Sponsor considered seizure an event of interest</li> </ul>                                                                                                                                                                                                                                                                                                                 |
| 70s/White                          | 568 | Use of medication that may lower seizure threshold (escitalopram) | Current use of medication that may lower seizure threshold and unexpected loss of consciousness within the last 12 months | 472<br><br>566 | <ul style="list-style-type: none"> <li>In agreement with the investigator, the event of loss of consciousness was assessed as not related to enzalutamide. Past history of loss of consciousness, syncope, and multiple co-morbid conditions may provide a more plausible explanation</li> <li>In agreement with the investigator, the event of epileptic seizure was assessed as possibly related to enzalutamide; however, the underlying malignancy and concurrent subdural hematoma may have provided alternative etiologies for the event</li> </ul> |

<sup>a</sup>Receiving chemotherapy with docetaxel.

Abbreviations: CNS, central nervous system; CVA, cerebrovascular accident; NR, not reported.
